# Supplementary material for: Enzyme mediated nanofibrillation of cellulose by the synergistic actions of an endoglucanase, lytic polysaccharide monooxygenase (LPMO) and xylanase
Source: PubMed Central journal article supplement (PMC5816652; doi:10.1038/s41598-018-21016-6), 2018-02-16
Supplement: 41598_2018_21016_MOESM1_ESM.pdf [file 41598_2018_21016_MOESM1_ESM.pdf]

# **Enzyme mediated nanofibrillation of cellulose by the synergistic actions of an endoglucanase, lytic polysaccharide monooxygenase (LPMO) and xylanase**

Jinguang Hu<sup>1</sup>, Dong Tian<sup>1,3</sup>, Scott Rennecker<sup>2</sup>, and Jack N. Saddler<sup>1\*</sup>

*1. Forest Products Biotechnology/Bioenergy Group, Department of Wood Science, Faculty of Forestry, University of British Columbia, 2424 Main Mall, Vancouver, British Columbia V6T 1Z4, Canada*

*2. Advanced Renewable Materials Lab, Department of Wood Science, Faculty of Forestry, University of British Columbia, 2424 Main Mall, Vancouver, British Columbia V6T 1Z4, Canada*

*3. Institute of Ecological and Environmental Sciences, Sichuan Agricultural University, Chengdu, Sichuan 611130, PR China*

*\*Corresponding author: Jack N. Saddler ([jack.saddler@ubc.ca](mailto:jack.saddler@ubc.ca))*

## **Supplementary Information**

**Table S1. The gross fiber properties (fiber length and fiber width) of bleached Kraft pulp (BKP) before and after 3 hours treatment with various enzyme.**

| Sample        | Fiber length ( $\mu\text{m}$ ) | Fiber width ( $\mu\text{m}$ ) |
|---------------|--------------------------------|-------------------------------|
| Control       | $761.3 \pm 28.9$               | $21.0 \pm 0.3$                |
| EG            | $765.1 \pm 15.3$               | $20.8 \pm 0.8$                |
| EG + AA9      | $753.8 \pm 23.3$               | $20.7 \pm 1.0$                |
| EG + EX       | $748.6 \pm 31.2$               | $20.5 \pm 0.3$                |
| EG + EX + AA9 | $746.9 \pm 30.8$               | $20.6 \pm 0.5$                |

EG: endoglucanase; AA9: lytic polysaccharide monooxygenase auxiliary activity family 9 enzyme; EX: endoxylanase. The experiment were performed in triplicate and the mean values and errors bars were calculated.

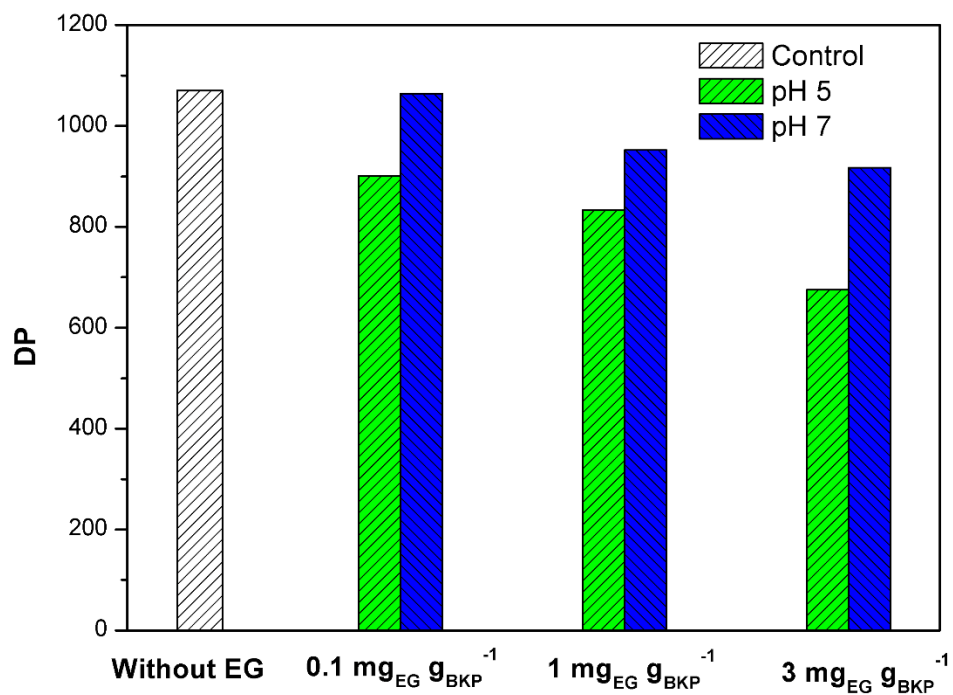

**Fig. S1 Reduction in the degree of polymerization (DP) of bleached Kraft pulp (BKP) after 3 hours endoglucanase (EG) treatment at different enzyme loadings at pH 5.0 and 7.0.**

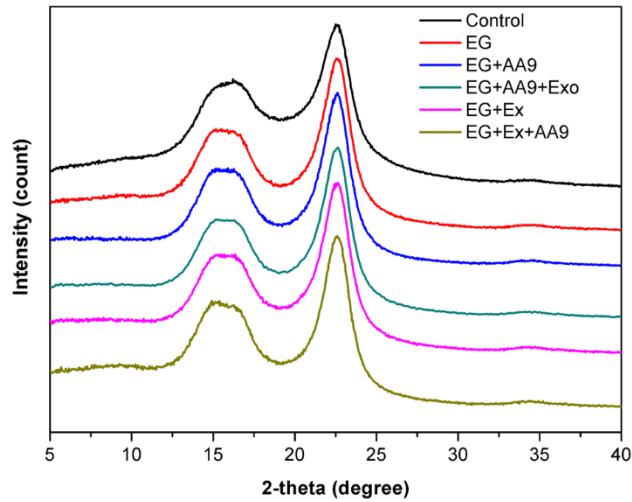

| Sample         | Segal CrI (%) | Crystal size (nm) |
|----------------|---------------|-------------------|
| Control        | 53.5          | 2.5               |
| EG             | 60.8          | 3.8               |
| EG + AA9       | 63.2          | 4.0               |
| EG + AA9 + Exo | 59.7          | 3.8               |
| EG + EX + AA9  | 71.1          | 3.9               |
| EG + EX        | 66.0          | 3.8               |

**Fig. S2 Changes in fiber crystallinity index (CrI) and crystal size ( $\tau$ ) of bleached Kraft pulp (BKP) after various enzyme treatments.**

EG: endoglucanase; AA9: lytic polysaccharide monoxygenase auxiliary activity family 9 enzyme; EX: endoxylanase; Exo: exoglucanase Cel6A.

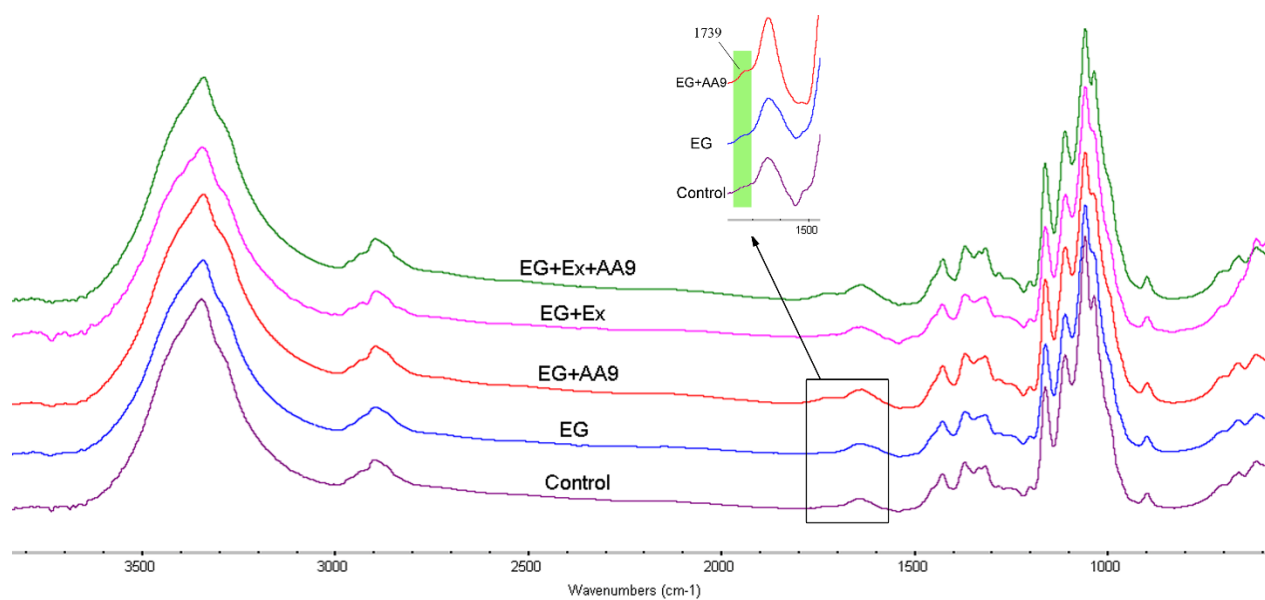

**Fig. S3 FT-IR spectrometry of bleached Kraft pulp (BKP) treated by various enzyme combinations.**

EG: endoglucanase; AA9: lytic polysaccharide monoxygenase auxiliary activity family 9 enzyme; EX: endoxylanase.

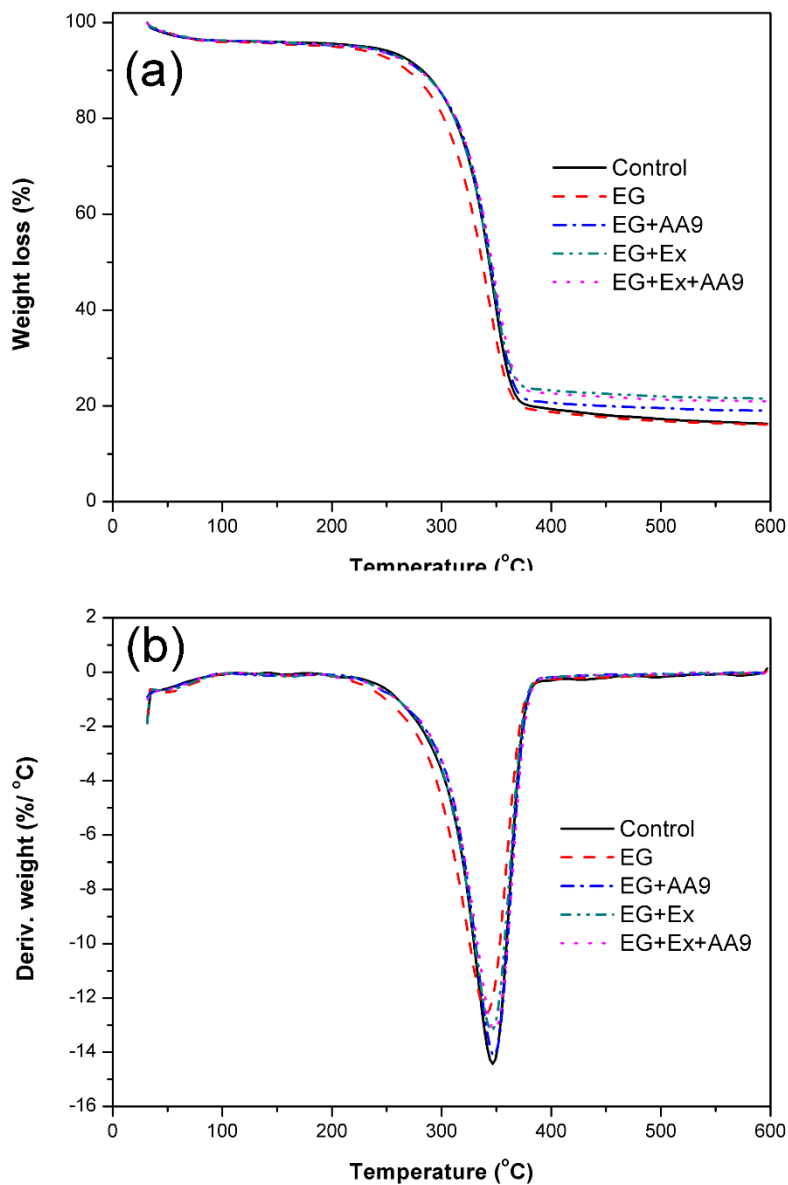

**Fig. S4 TGA (a) and DTG (b) curves of enzymatically pretreated bleached Kraft pulp (BKP) after sonication and assessed by thermal gravimetric analysis (TGA).**

EG: endoglucanase; AA9: lytic polysaccharide monooxygenase auxiliary activity family 9 enzyme; EX: endoxylanase.

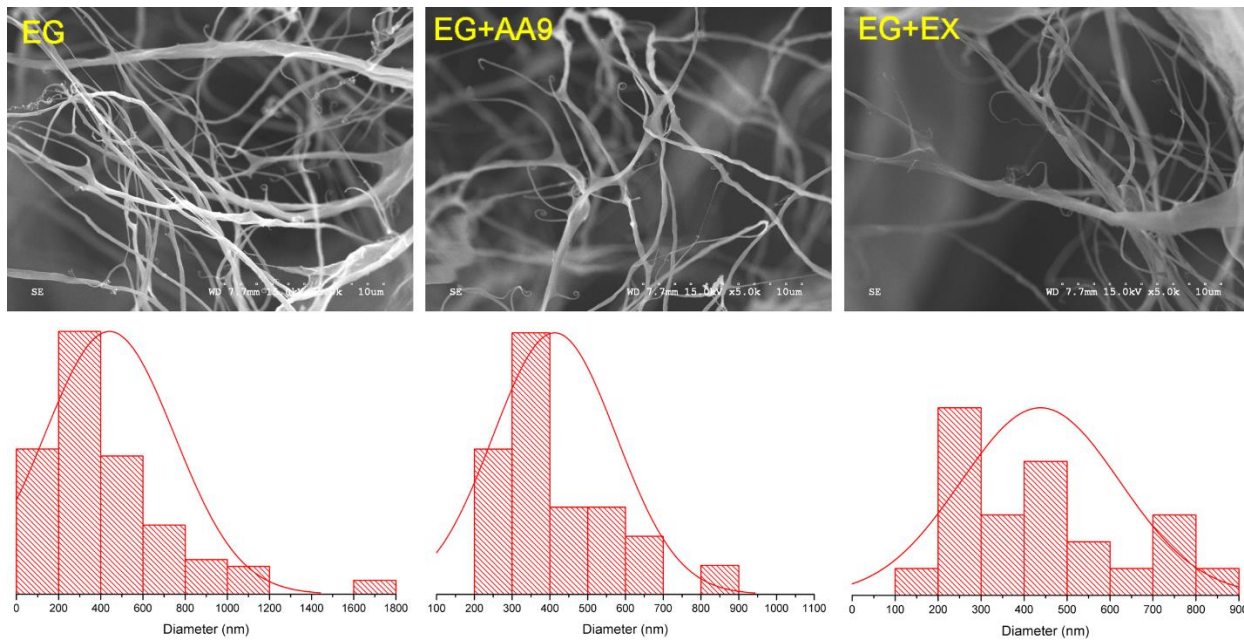

**Figure S5. SEM images of enzymatically pretreated bleached kraft pulp (BKP) fiber suspension after sonication process (A) and the fiber width distribution of pretreated sample (B).**

EG: endoglucanase; AA9: lytic polysaccharide monoxygenase auxiliary activity family 9 enzyme; EX: endoxylanase.
